# Supplementary material for: Hollow mesoporous carbon nanospheres for imaging-guided light-activated synergistic thermo-chemotherapy
Source: Royal Society of Chemistry journal article supplement (doi:10.1039/c9nr04802b), 2019-01-01
Supplement: c9nr04802b1.pdf [file c9nr04802b1.pdf]

## Supplementary information

### Hollow mesoporous carbon nanospheres for imaging-guided light-activated synergistic thermo-chemotherapy

Yuwei Qiu<sup>a</sup>, Dandan Ding<sup>a</sup>, Wenjing Sun<sup>a</sup>, Yushuo Feng<sup>a</sup>, Doudou Huang<sup>a</sup>, Sicheng

Li<sup>a</sup>, Shanshan Meng<sup>a</sup>, Qingliang Zhao<sup>a,\*</sup>, Li-Jun Xue<sup>b,\*</sup>, Hongmin Chen<sup>a,\*</sup>

<sup>a</sup>State Key Laboratory of Molecular Vaccinology and Molecular Diagnostics & Center for Molecular Imaging and Translational Medicine, School of Public Health, Xiamen University, Xiamen 361102, China

<sup>b</sup>Department of Medical Oncology, Jinling Hospital, Nanjing University Clinical School of Medicine, Nanjing, 210002, China

\*Corresponding author:

zhaoql@xmu.edu.cn (Q.Z.); xue\_lj@163.com (L.X.); hchen@xmu.edu.cn (H.C.)

### Calculation of the photothermal conversion efficiency

The photothermal conversion efficiency of the HMCNs was determined by the Equation 1<sup>1,2</sup>:

$$\eta = \frac{hS(T_{max} - T_{surr}) - Q_{Dis}}{I(1 - 10^{-A\lambda})} \quad (1)$$

Where  $h$  is the heat-transfer coefficient,  $S$  is the surface area of the container,  $T_{max}$  is the equilibrium temperature,  $T_{surr}$  is room temperature,  $Q_{Dis}$  is the heat dissipation due to the light absorbed by the quartz sample cell,  $I$  is the laser power, and  $A\lambda$  is the absorbance at an excitation wavelength of 808 nm. The value of  $hS$  was derived according to the following Equation 2:

$$hS = \frac{m_D C_D}{\tau_s} \quad (2)$$

Where  $\tau_s$  is the sample system time constant, which can be obtained from Figure S3b,  $m_D$  and  $C_D$  are the mass (0.22 g) and heat capacity (4.2 J·g<sup>-1</sup>) of deionized water, respectively. In order to gain  $hS$ , a dimensionless parameter is introduced:

$$\theta = \frac{T - T_{surr}}{T_{max} - T_{surr}} \quad (3)$$

And the sample system time constant  $\tau_s$  can be calculated as Equation 4:

$$t = -\tau_s \ln(\theta) \quad (4)$$

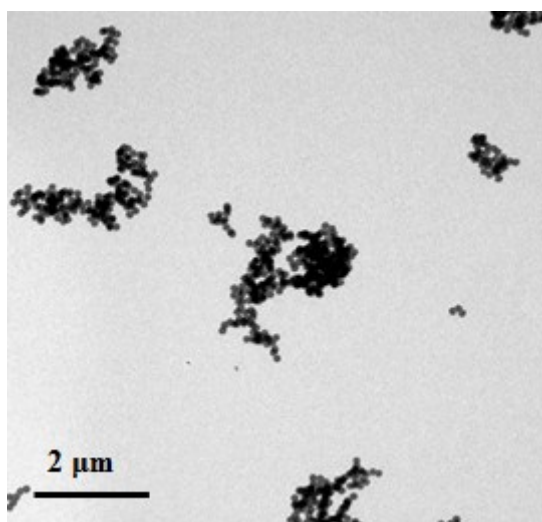

**Fig. S1** The TEM image of BCPs.

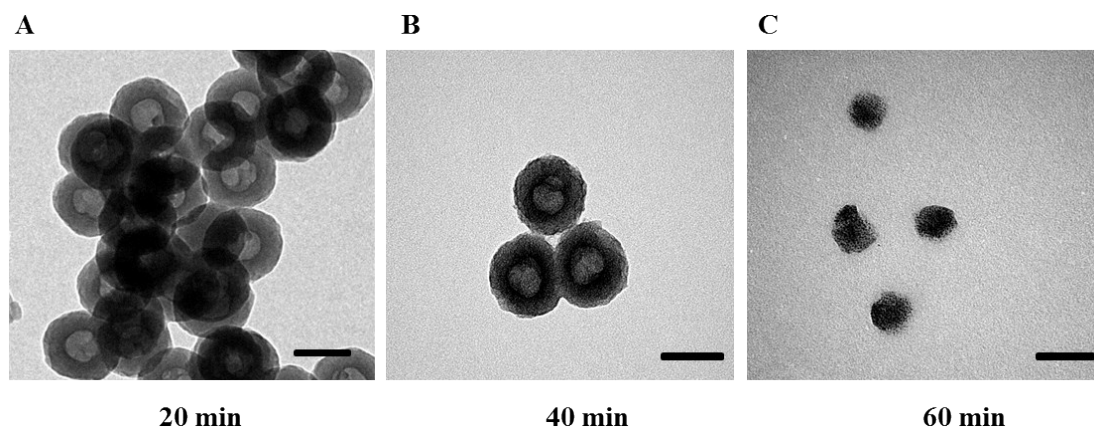

**Fig. S2** The TEM images of BCPs after HNO<sub>3</sub> treatment with (A) 20 min, (B) 40 min and (C) 60 min, respectively (Scale bar: 100 nm).

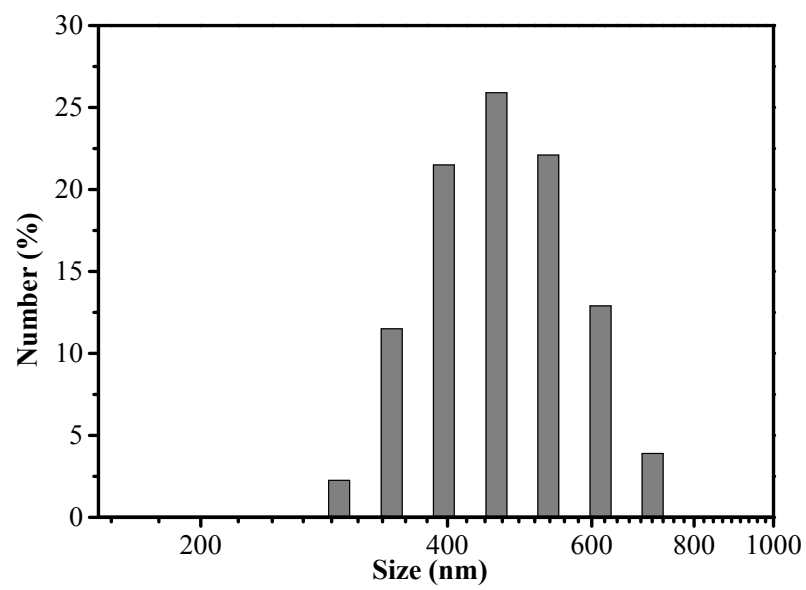

**Fig. S3** Size distribution of BCPs in water.

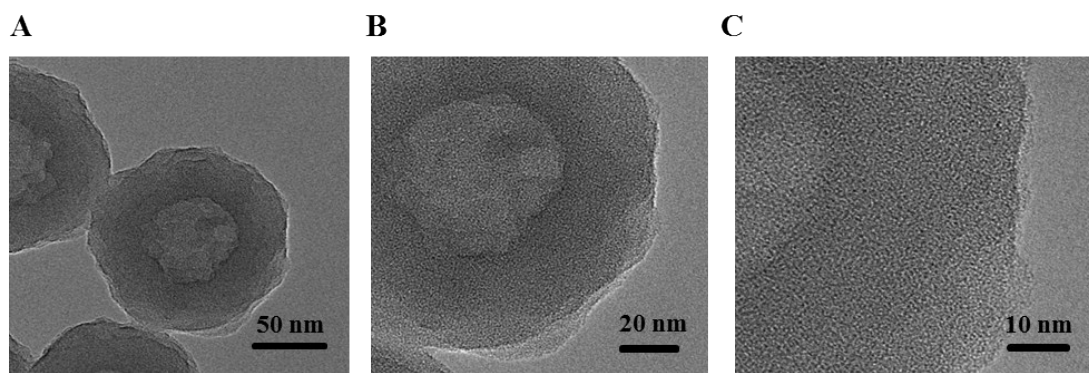

**Fig. S4** HR-TEM images of HMCNs.

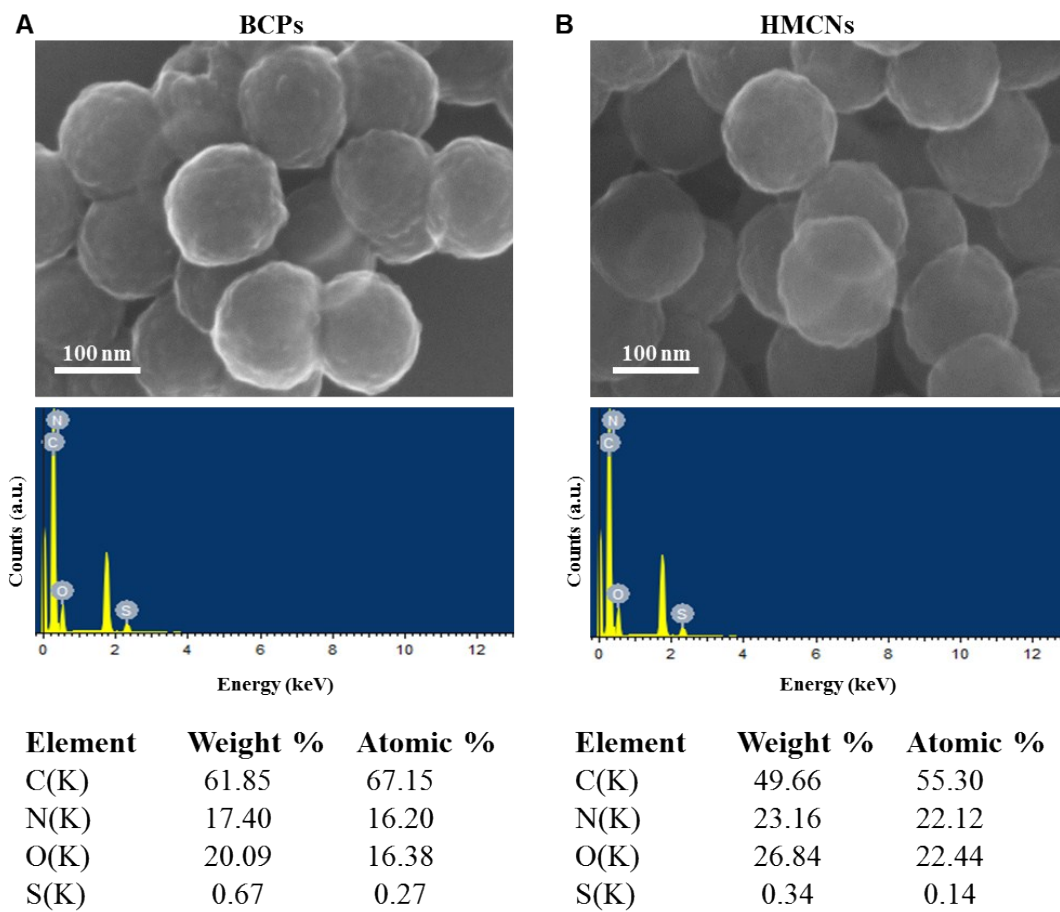

**Fig. S5** SEM images and EDX spectra of (A) BCPs and (B) HMCNs.

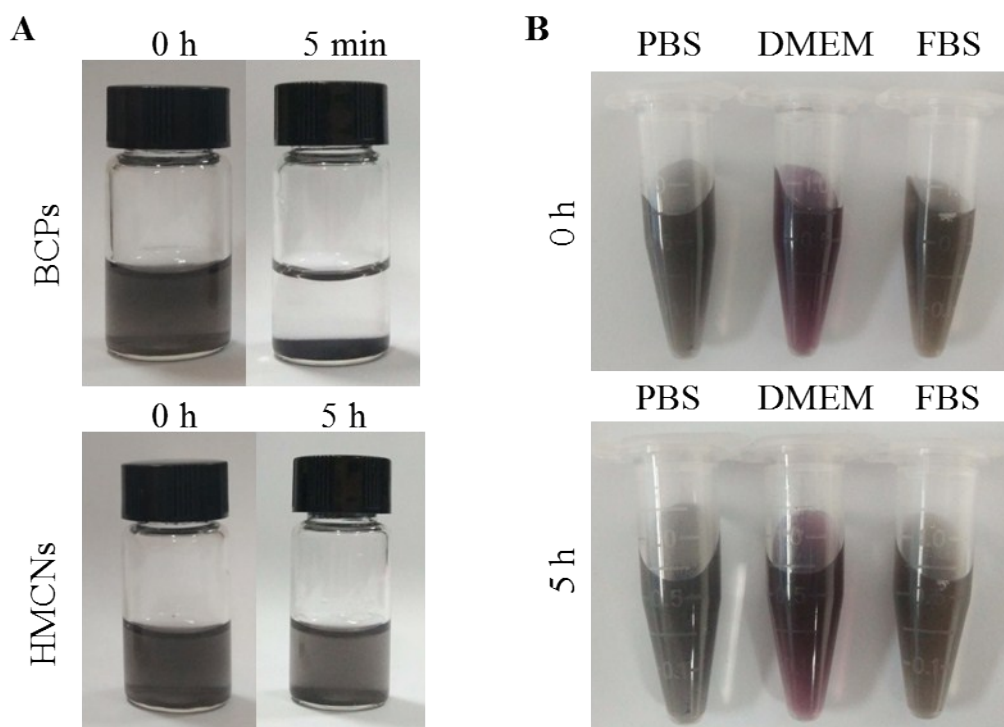

**Fig. S6** (A) Photograph of BCPs and HMCNs dispersed in water at different time points. (B) The stability of HMCNs (100  $\mu\text{g/mL}$ ) in different medium in 5 h.



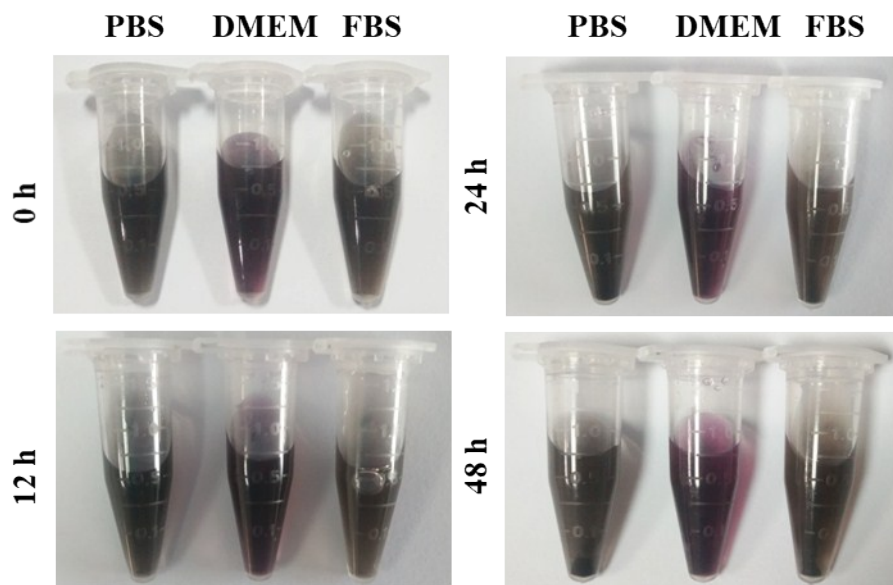

**Fig. S7** The stability of HMCNs (100  $\mu\text{g}/\text{mL}$ ) in different medium with 12, 24, 48 h.

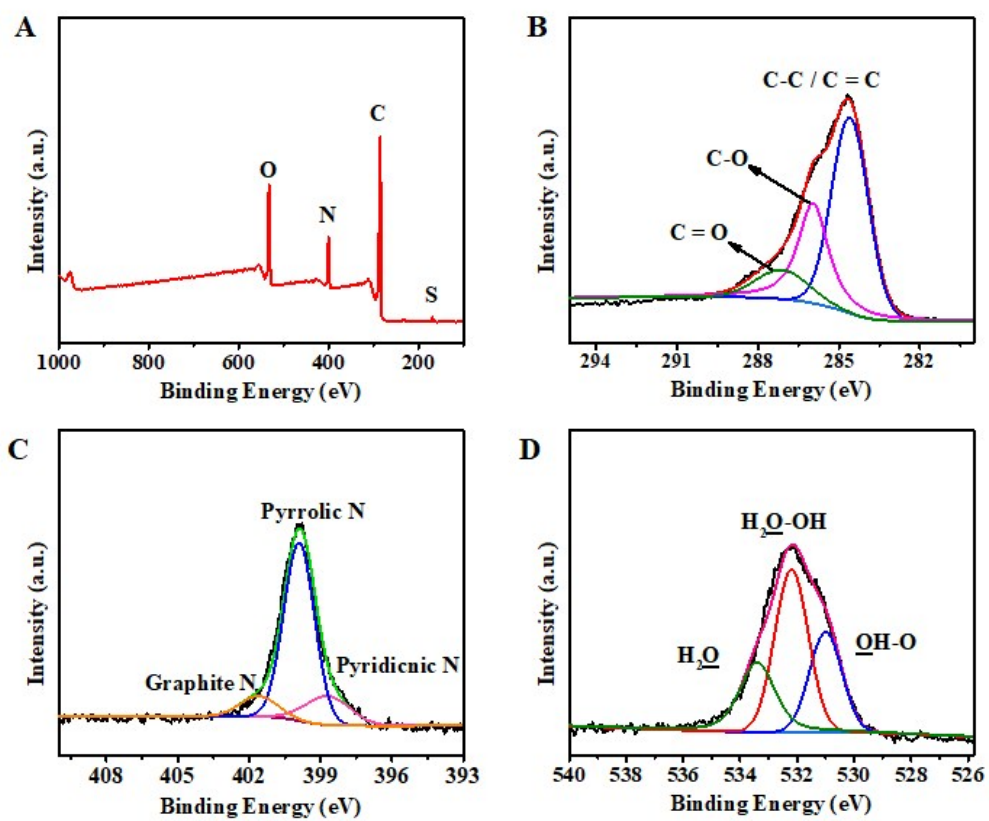

**Fig. S8** (A) The full-scan XPS spectrum of HMCNs. (B) High-resolution C1s scan. (C) High-resolution N1s scan. (D) High-resolution O1s scan.

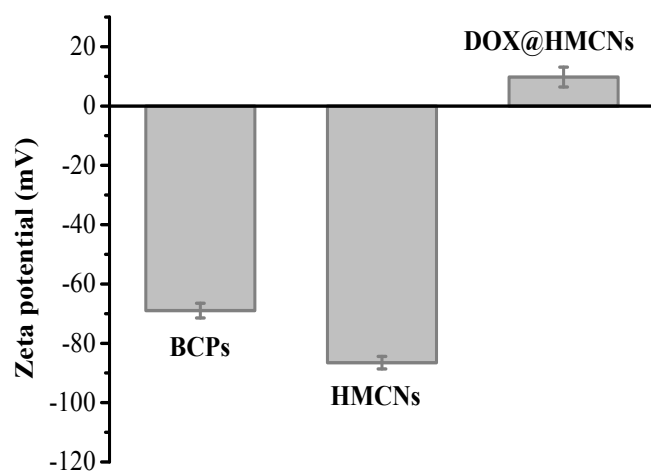

**Fig. S9** Zeta potential of original BCPs, HMCNs, and DOX@HMCNs.

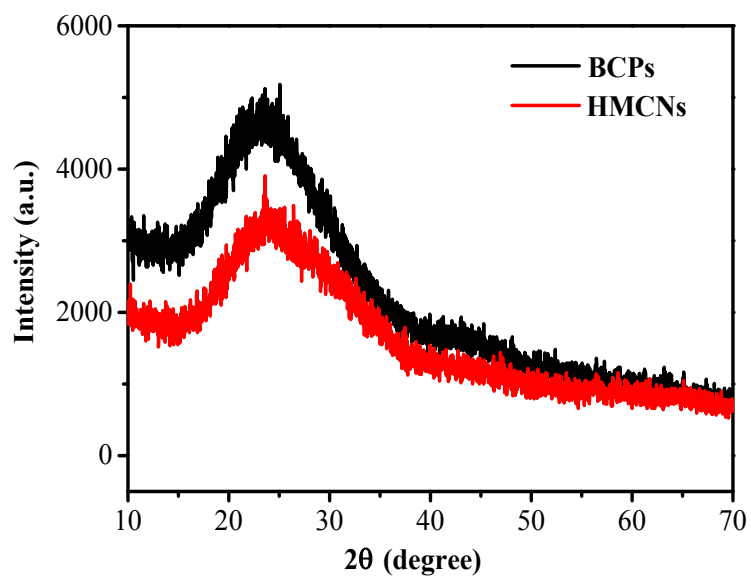

**Fig. S10** XRD patterns of BCPs, HMCNs.

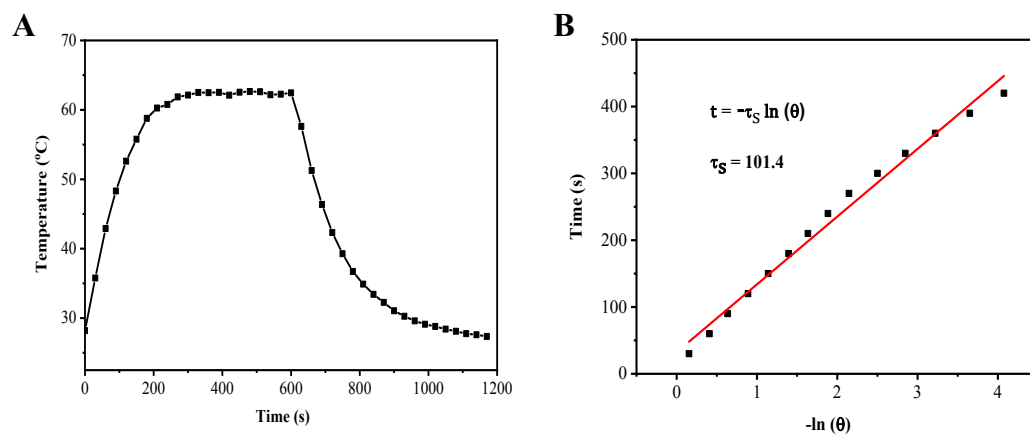

**Fig. S11** (A) Photothermal response of HMCNs aqueous dispersion ( $100 \mu\text{g}\cdot\text{mL}^{-1}$ ,  $200 \mu\text{L}$ ) under 808 nm laser irradiation. (B) Calculation of the time constant for heat transfer using a linear regression obtained from the cooling period of Fig. S11A.

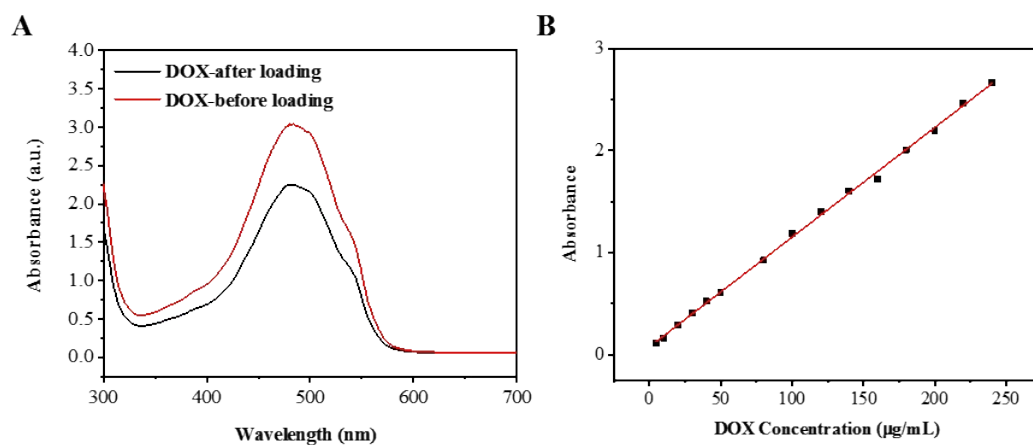

**Fig. S12** (A) UV-Vis spectra of DOX solution before and after loading. (B) calibration curve for DOX release study.

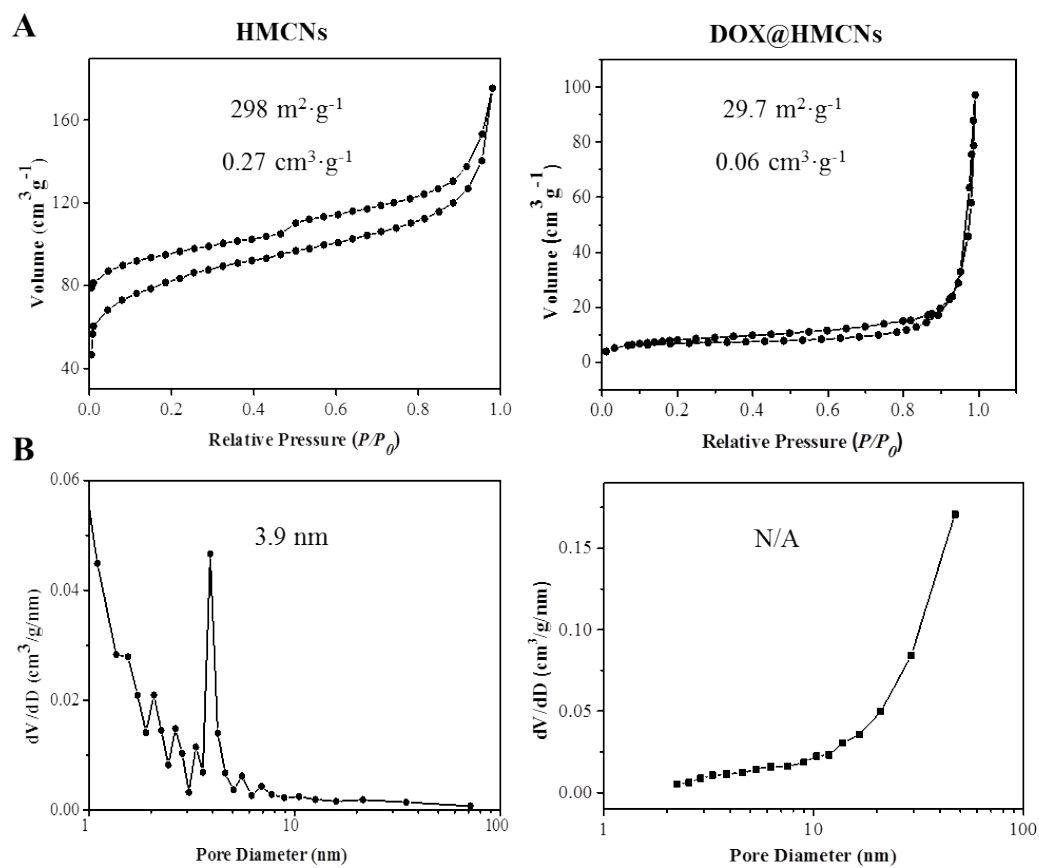

**Fig. S13** Nitrogen adsorption/desorption isotherms (A) and pore size distribution (B) of HMCNs and DOX@HMCNs.

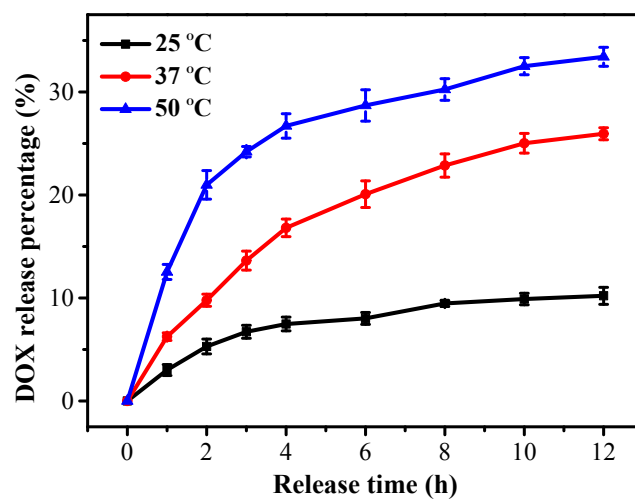

**Fig. S14** Cumulative releases of DOX from DOX@HMCNs at pH 6.0 with different temperatures of 25, 37 and 50 °C.



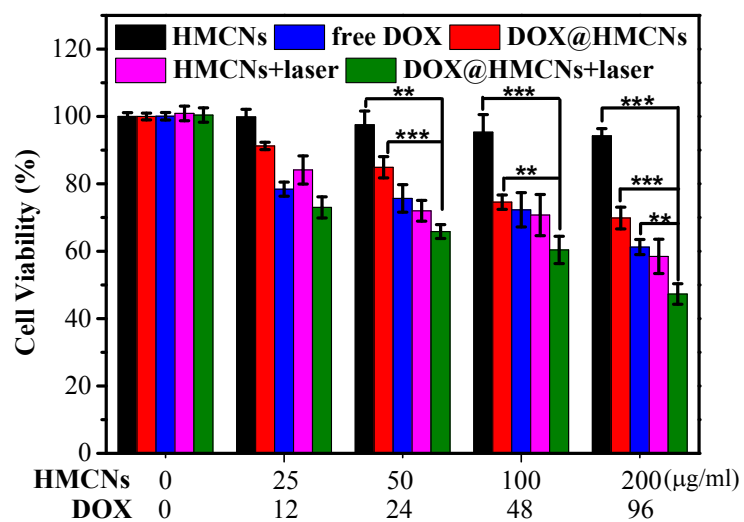

**Fig. S15** The concentration-dependent cell viability of U87 MG cells treated with various groups for 4 h (\*\*P<0.01, \*\*\*P<0.001).

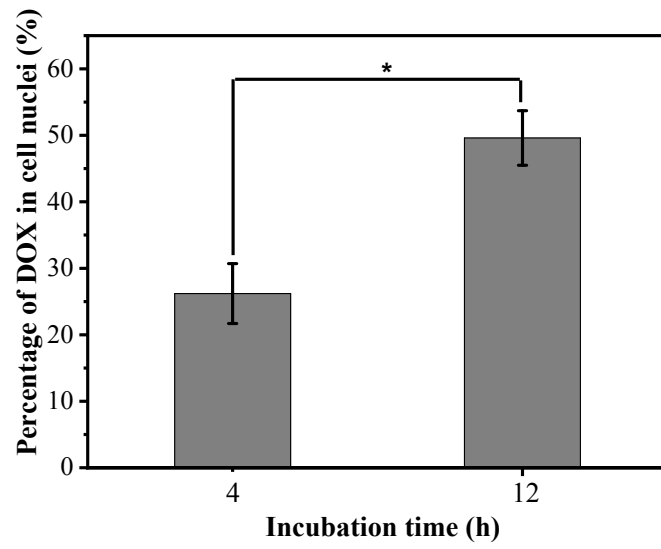

**Fig. S16** Percentage of DOX in cell nuclei after 4 and 12 h incubation (\* $P < 0.05$ ).

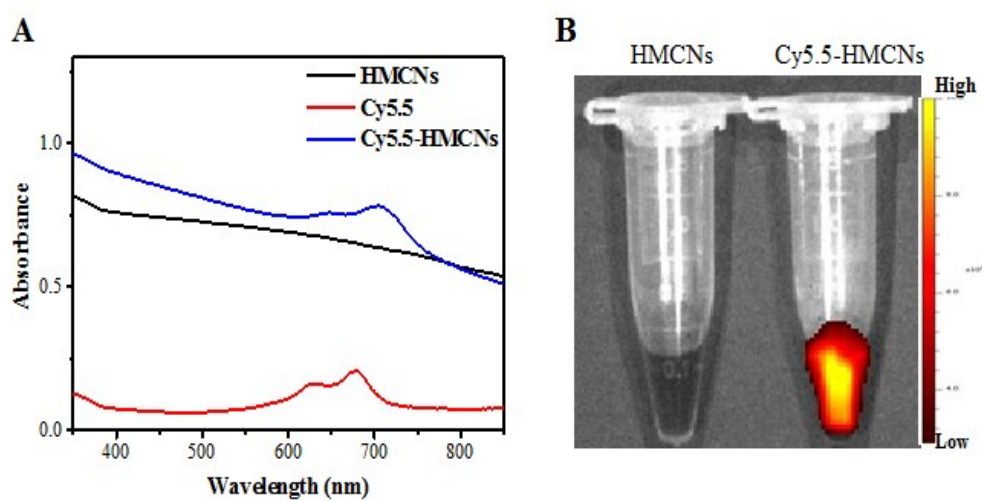

**Fig. S17** (A) UV-Vis spectra of Cy5.5, HMCNs and Cy5.5-HMCNs. (B) The fluorescent imaging of HMCNs and Cy5.5-HMCNs.

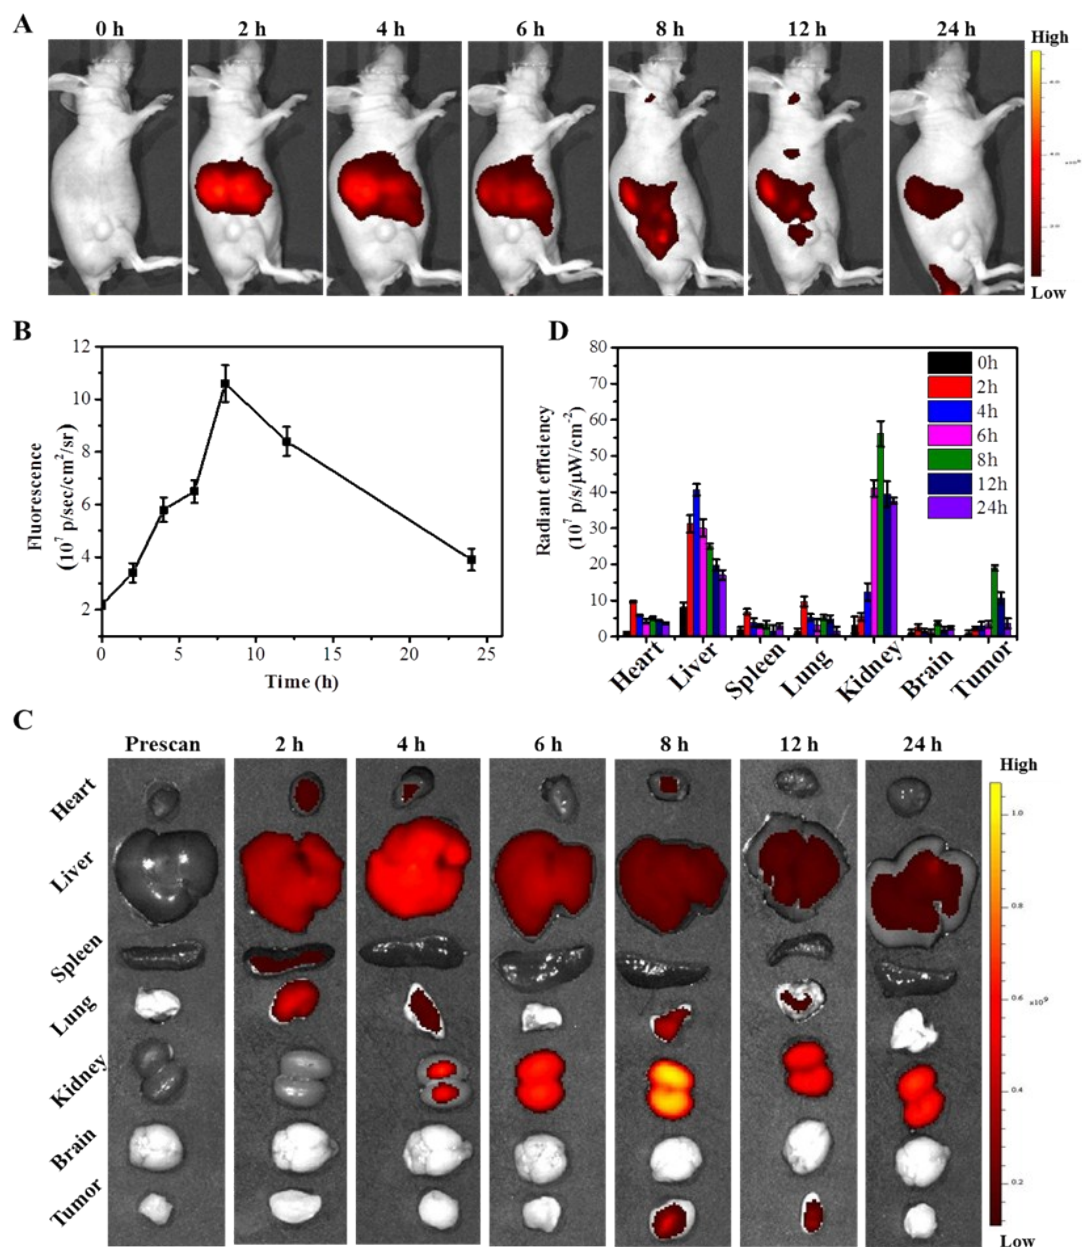

**Fig. S18** (A) *In vivo* fluorescence images of U87MG tumor bearing nude mice taken at different time points post i.v. injection of Cy5.5-HMCNs. (B) Fluorescence intensity of tumors at different time points. (C) *Ex vivo* fluorescence images of organs and tumors excised at different time points post i.v. injection of Cy5.5-HMCNs. (D) Quantification of fluorescent signals of each organs and tumors excised at different time points post i.v. injection of Cy5.5-HMCNs.

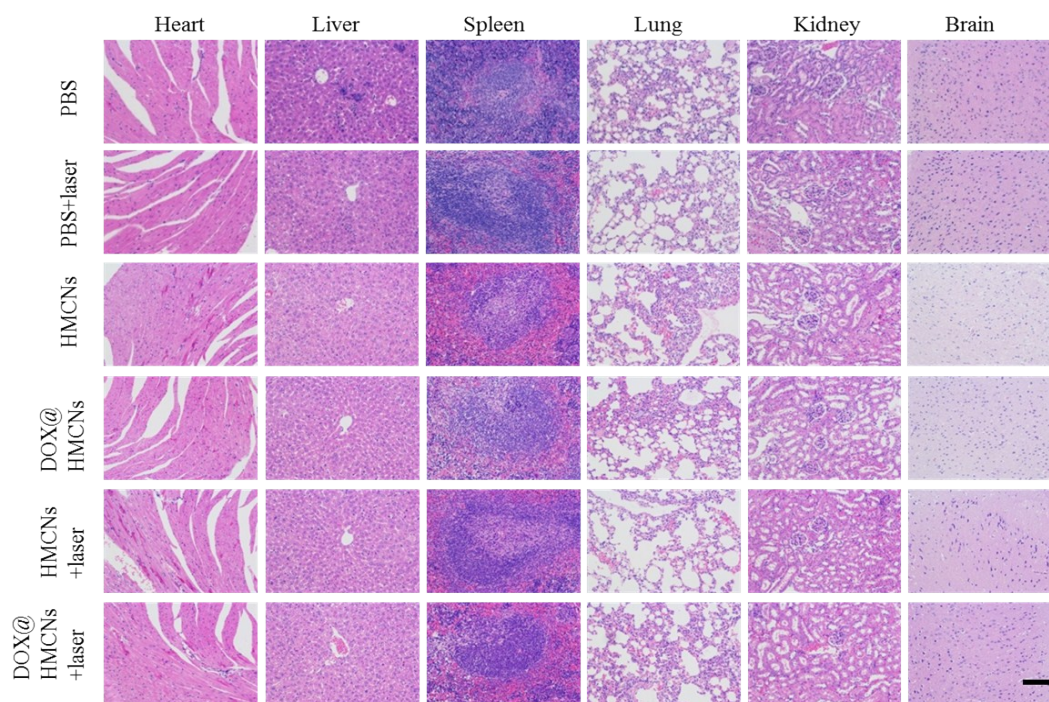

**Fig. S19** H&E staining of different tissues collected from mice post various treatments. Scale bar: 100  $\mu$ m.

## References

1. X. J. Liu, B. Li, F. F. Fu, K. B. Xu, R. J. Zou, Q. Wang, B. J. Zhang, Z. G. Chen and J. Q. Hu, *Dalton Trans.*, 2014, **43**, 11709-11715.
2. D. K. Roper, W. Ahn and M. Hoepfner, *J Phys Chem C*, 2007, **111**, 3636-3641.
